# Supplementary material for: Quantifying microstructures of Earth materials using higher-order spatial correlations and deep generative adversarial networks
Source: Research Square preprint supplement (doi:10.21203/rs.3.rs-2128261/v1), 2022-10-05
Supplement: Supplementary file 1 [file 62689fdd4f856b2bcace781c.pdf]

# Supplementary Information for "Quantifying microstructures of earth materials using higher-order spatial correlations and deep generative adversarial networks"

Hamed Amiri<sup>1,\*</sup>, Ivan Vasconcelos<sup>1</sup>, Yang Jiao<sup>2</sup>, Pei-En Chen<sup>3</sup>, and Oliver Plümper<sup>1</sup>

<sup>1</sup>Department of Earth Sciences, Utrecht University, Utrecht, the Netherlands

<sup>2</sup>Materials Science and Engineering, Arizona State University, Tempe, U.S.A.

<sup>3</sup>Mechanical and Aerospace Engineering, Arizona State University, Tempe, U.S.A.

\*h.amiri@uu.nl

## ABSTRACT

### Model architecture

Table S1. presents the architectures used for the generator and the discriminator. Note that no batch normalisation should be applied in the discriminator's layers, otherwise WGAN-GP does not improve the stability as reported by<sup>1</sup>. This is critical in WGAN-GP as the norm of the discriminator's gradient is penalized according to each image instead of the entire batch<sup>2</sup>. A convolution layer is also added before the last layer in the generator to avoid checkerboard pattern artefacts created by the uneven overlap in the transpose convolution layers<sup>3</sup>. In generator, However, batch normalisation is followed at each layer by applying a rectified linear unit (ReLU) or leaky ReLU as activation functions<sup>4,5</sup>. Our investigation indicates better results are obtained when no activation function is applied in the discriminator's last layer. Table S2 provides the parameters for training the WGAN-GP in both case studies. Network weights were first randomly initialised and then were updated at each iteration by the Adam optimiser<sup>6</sup> using the reported learning rate and momenta. Discriminator repeats are the number of times the discriminator's weights were updated for each generator update. Table S3 reports the mean square errors (MSEs) between scaled spatial-correlation functions derived from original and reconstructed microstructures using SA and WGAN-GP methods. It can be seen that the MSE associated with WGAN-GP is two to three orders of magnitude less than SA, except for the two-point correlation function.

**Table S 1.** Generator and discriminator architecture in this study.

| Layer                | Type        | Filters | Kernel       | Stride | Padding | Batch | Activation |
|----------------------|-------------|---------|--------------|--------|---------|-------|------------|
| <b>Generator</b>     |             |         |              |        |         |       |            |
| 1                    | ConvTrans2D | 1024    | $4 \times 4$ | 1      | 0       | Yes   | ReLU       |
| 2                    | ConvTrans2D | 512     | $4 \times 4$ | 2      | 1       | Yes   | ReLU       |
| 3                    | ConvTrans2D | 256     | $4 \times 4$ | 2      | 1       | Yes   | ReLU       |
| 4                    | ConvTrans2D | 128     | $4 \times 4$ | 2      | 1       | Yes   | ReLU       |
| 5                    | ConvTrans2D | 64      | $4 \times 4$ | 2      | 1       | Yes   | ReLU       |
| 6                    | Conv2D      | 64      | $1 \times 1$ | 1      | 0       | Yes   | ReLU       |
| 7                    | ConvTrans2D | 1       | $4 \times 4$ | 2      | 1       | No    | Tanh       |
| <b>Discriminator</b> |             |         |              |        |         |       |            |
| 1                    | Conv2D      | 64      | $4 \times 4$ | 2      | 1       | No    | LeakyReLU  |
| 2                    | Conv2D      | 128     | $4 \times 4$ | 2      | 1       | No    | LeakyReLU  |
| 3                    | Conv2D      | 256     | $4 \times 4$ | 2      | 1       | No    | LeakyReLU  |
| 4                    | Conv2D      | 512     | $4 \times 4$ | 2      | 1       | No    | LeakyReLU  |
| 5                    | Conv2D      | 1024    | $4 \times 4$ | 2      | 1       | No    | LeakyReLU  |
| 6                    | Conv2D      | 1       | $4 \times 4$ | 1      | 0       | No    | None       |

**Table S 2.** Training parameters used in this study.

|                                |                  |
|--------------------------------|------------------|
| Image size                     | 128 <sup>2</sup> |
| Batch size                     | 128              |
| Noise vector ( $z$ ) dimension | 512              |
| Generator filters              | 64               |
| Discriminator filters          | 64               |
| Learning rate ( $\alpha$ )     | 0.0001           |
| Momenta( $\beta_1, \beta_2$ )  | (0.5, 0.999)     |
| Discriminator repeats          | 5                |
| Coefficient( $\lambda$ )       | 10               |

## References

1. Guan, K. Reconstructing pore networks using generative adversarial networks. (2018).
2. Gulrajani, I., Ahmed, F., Arjovsky, M., Dumoulin, V. & Courville, A. C. Improved training of wasserstein gans. *Adv. neural information processing systems* **30** (2017).
3. Odena, A., Dumoulin, V. & Olah, C. Deconvolution and checkerboard artifacts. *Distill* **1**, e3 (2016).
4. Maas, A. L., Hannun, A. Y., Ng, A. Y. *et al.* Rectifier nonlinearities improve neural network acoustic models. In *Proc. icml*, vol. 30, 3 (Citeseer, 2013).
5. Shang, W., Sohn, K., Almeida, D. & Lee, H. Understanding and improving convolutional neural networks via concatenated rectified linear units. In *international conference on machine learning*, 2217–2225 (PMLR, 2016).
6. Kingma, D. P. & Ba, J. Adam: A method for stochastic optimization. *arXiv preprint arXiv:1412.6980* (2014).

**Table S 3.** The assessment of image reconstruction quality using SA and our WGAN-GP. The values are mean square errors (MSEs) calculated between correlation functions of original and reconstructed images as shown in Figs. 4-5.

| Correlation functions | Meta-igneous          |                       | Serpentine            |                       |
|-----------------------|-----------------------|-----------------------|-----------------------|-----------------------|
|                       | SA                    | WGAN-GP               | SA                    | WGAN-GP               |
| $S_2$                 | $8.26 \times 10^{-6}$ | $2.16 \times 10^{-5}$ | $5.94 \times 10^{-5}$ | $4.42 \times 10^{-5}$ |
| $P_{3H}$              | $5.23 \times 10^{-5}$ | $2.96 \times 10^{-7}$ | $1 \times 10^{-3}$    | $2.13 \times 10^{-6}$ |
| $P_{3V}$              | $7.69 \times 10^{-5}$ | $4.72 \times 10^{-7}$ | $1.27 \times 10^{-3}$ | $3.78 \times 10^{-6}$ |
| $P_4$                 | $6 \times 10^{-5}$    | $1.61 \times 10^{-6}$ | $1.33 \times 10^{-3}$ | $5.74 \times 10^{-6}$ |
| $P_6$                 | $2.98 \times 10^{-5}$ | $2.56 \times 10^{-7}$ | $1.19 \times 10^{-3}$ | $1.44 \times 10^{-6}$ |
